# Supplementary material for: Reporting of data on participant ethnicity and socioeconomic status in high-impact medical journals: a targeted literature review
Source: HighWire-hosted journal article supplement (doi:10.1136/bmjopen-2022-064276), 2022-08-01
Supplement: bmjopen-2022-064276supp001_data_supplement.pdf [file bmjopen-2022-064276supp001_data_supplement.pdf]

## Reporting of data on participant ethnicity and socioeconomic status in high-impact medical journals: A targeted literature review: Supplementary Tables

Table 1: Research papers included in the sample

| Journal | Date of pub | Title                                                                                  | DOI                   | Country of journal | Country of study/Corresponding author | Manuscript type                | Study design                        | Report baseline/participants characteristics (which & how)                                                                             |
|---------|-------------|----------------------------------------------------------------------------------------|-----------------------|--------------------|---------------------------------------|--------------------------------|-------------------------------------|----------------------------------------------------------------------------------------------------------------------------------------|
| NEJM    | 15/04/2021  | Hypothermic Machine Perfusion in Liver Transplantation — A Randomized Trial            | 10.1056/NEJMoa2031532 | USA                | Multicentre Europe                    | Original research (full paper) | RCT                                 | Yes: Age, male sex, BMI, preservation of liver measures,                                                                               |
| NEJM    | 15/04/2021  | Trial of Psilocybin versus Escitalopram for Depression                                 | 10.1056/NEJMoa2032994 | USA                | UK                                    | Original research (full paper) | RCT                                 | Yes: Age, female sex, white race, employment status, university level education, disease specific variables.                           |
| NEJM    | 15/04/2021  | BNT162b2 mRNA Covid-19 Vaccine in a Nationwide Mass Vaccination Setting                | 10.1056/NEJMoa2101765 | USA                | Israel                                | Original research (full paper) | Case Control                        | Yes: Age, female/male (sex), population sector (general Jewish, Arab, Ultra-orthodox Jewish), comorbidities,                           |
| NEJM    | 15/04/2021  | Dexmedetomidine or Propofol for Sedation in Mechanically Ventilated Adults with Sepsis | 10.1056/NEJMoa2024922 | USA                | USA                                   | Original research (full paper) | RCT                                 | Yes: Age, Female sex %, BMI, 'Race or Ethnic Group' White, Black, Latinx, multiple or other; cognitive decline score; clinical illness |
| NEJM    | 08/04/2021  | Lenvatinib plus Pembrolizumab or Everolimus for Advanced Renal Cell Carcinoma          | 10.1056/NEJMoa2035716 | USA                | Global                                | Original research (full paper) | RCT                                 | Yes: Age, sex (male/female), geographic region,                                                                                        |
| NEJM    | 08/04/2021  | Lower or Higher Oxygenation Targets for Acute Hypoxemic Respiratory Failure            | 10.1056/NEJMoa2032510 | USA                | Denmark                               | Original research (full paper) | RCT                                 | Yes: Age, sex %male, comorbidities, illness/admission metrics                                                                          |
| NEJM    | 08/04/2021  | Glycemic Index, Glycemic Load, and Cardiovascular Disease and Mortality                | 10.1056/NEJMoa2007123 | USA                | Global                                | Original research (full paper) | Cohort study                        | Yes: Age, sex %male, urban residence, health risk factors, results by continents                                                       |
| NEJM    | 08/04/2021  | Sutimlimab in Cold Agglutinin Disease                                                  | 10.1056/NEJMoa2027760 | USA                | Germany                               | Original research (full paper) | Intervention trial (other than RCT) | Yes: Age, sex %female, geographic location (Europe, Japan, USA, Australia), disease characteristics,                                   |

|            |            |                                                                                                                                                                                                                                   |                               |     |           |                                |                               |                                                                                                                                                                                               |
|------------|------------|-----------------------------------------------------------------------------------------------------------------------------------------------------------------------------------------------------------------------------------|-------------------------------|-----|-----------|--------------------------------|-------------------------------|-----------------------------------------------------------------------------------------------------------------------------------------------------------------------------------------------|
| NEJM       | 08/04/2021 | Antibody Responses in Seropositive Persons after a Single Dose of SARS-CoV-2 mRNA Vaccine                                                                                                                                         | 10.1056/NEJMc2101667          | USA | USA       | Original research (letter)     | Cohort study                  | Yes: Age, gender (male, female, prefer not to say),                                                                                                                                           |
| NEJM       | 01/04/2021 | Adjuvant Nivolumab in Resected Esophageal or Gastroesophageal Junction Cancer                                                                                                                                                     | 10.1056/NEJMoa2032125         | USA | Global    | Original research (full paper) | RCT                           | Yes: Age, male sex %, race (white, Asian, black, other, not reported), Geographic region (Europe, US, Canada, Asia)                                                                           |
| The Lancet | 17/04/2021 | Thromboembolism and the Oxford–AstraZeneca COVID-19 vaccine: side-effect or coincidence?                                                                                                                                          | 10.1016/S0140-6736(21)00762-5 | UK  | Denmark   | Original research (letter)     | Cohort study                  | Yes: age group, female + male numbers                                                                                                                                                         |
| The Lancet | 17/04/2021 | Effect of infusion set replacement intervals on catheter-related bloodstream infections (RSVP): a randomised, controlled, equivalence (central venous access device)–non-inferiority (peripheral arterial catheter) trial         | 10.1016/S0140-6736(21)00351-2 | UK  | Australia | Original research (full paper) | RCT                           | Yes: Age, male/female, disease/hospital stay characteristics                                                                                                                                  |
| The Lancet | 17/04/2021 | SARS-CoV-2 infection rates of antibody-positive compared with antibody-negative health-care workers in England: a large, multicentre, prospective cohort study (SIREN)                                                            | 10.1016/S0140-6736(21)00675-9 | UK  | England   | Original research (full paper) | Cohort study                  | Yes: Gender (female, male, other); Age; Ethnicity (white, mixed race, Asian, black, Chinese, other, prefer not to say), medical conditions, index of multiple deprivation, region of England. |
| The Lancet | 10/04/2021 | Efficacy of ChAdOx1 nCoV-19 (AZD1222) vaccine against SARS-CoV-2 variant of concern 202012/01 (B.1.1.7): an exploratory analysis of a randomised controlled trial                                                                 | 10.1016/S0140-6736(21)00628-0 | UK  | UK        | Original research (full paper) | RCT (Secondary data analysis) | Yes: age, % female, ethnicity white, black, Asian, mixed, other, missing,                                                                                                                     |
| The Lancet | 10/04/2021 | The SANAD II study of the effectiveness and cost-effectiveness of levetiracetam, zonisamide, or lamotrigine for newly diagnosed focal epilepsy: an open-label, non-inferiority, multicentre, phase 4, randomised controlled trial | 10.1016/S0140-6736(21)00247-6 | UK  | UK        | Original research (full paper) | RCT                           | Yes: Age, gender (male/female),                                                                                                                                                               |
| The Lancet | 10/04/2021 | The SANAD II study of the effectiveness and cost-effectiveness of valproate versus levetiracetam for newly diagnosed generalised and unclassifiable epilepsy: an open-label, non-                                                 | 10.1016/S0140-6736(21)00246-4 | UK  | UK        | Original research (full paper) | RCT                           | Yes: Age, gender (male/female),                                                                                                                                                               |

|            |            |                                                                                                                                                                                                                                                                                                                                              |                               |     |              |                                |                                     |                                                                                                                                                                                                                                                       |
|------------|------------|----------------------------------------------------------------------------------------------------------------------------------------------------------------------------------------------------------------------------------------------------------------------------------------------------------------------------------------------|-------------------------------|-----|--------------|--------------------------------|-------------------------------------|-------------------------------------------------------------------------------------------------------------------------------------------------------------------------------------------------------------------------------------------------------|
|            |            | inferiority, multicentre, phase 4, randomised controlled trial                                                                                                                                                                                                                                                                               |                               |     |              |                                |                                     |                                                                                                                                                                                                                                                       |
| The Lancet | 03/04/2021 | Efficacy and safety of dolutegravir with emtricitabine and tenofovir alafenamide fumarate or tenofovir disoproxil fumarate, and efavirenz, emtricitabine, and tenofovir disoproxil fumarate HIV antiretroviral therapy regimens started in pregnancy (IMPAACT 2010/VESTED): a multicentre, open-label, randomised, controlled, phase 3 trial | 10.1016/S0140-6736(21)00314-7 | UK  | Global       | Original research (full paper) | RCT                                 | Yes: Age, all female (in pregnancy), Country, race (Black, Asian, White, Other, unknown),                                                                                                                                                             |
| The Lancet | 03/04/2021 | Comparison of two delayed strategies for renal replacement therapy initiation for severe acute kidney injury (AKIKI 2): a multicentre, open-label, randomised, controlled trial                                                                                                                                                              | 10.1016/S0140-6736(21)00350-0 | UK  | France       | Original research (full paper) | RCT                                 | Yes: Age, sex (female/male), comorbidities                                                                                                                                                                                                            |
| The Lancet | 27/03/2021 | Evaluating Progestogens for Preventing Preterm birth International Collaborative (EPPPIC): meta-analysis of individual participant data from randomised controlled trials                                                                                                                                                                    | 10.1016/S0140-6736(21)00217-8 | UK  | Not provided | Original research (full paper) | Systematic review and meta-analysis | Yes: age, all female (in pregnancy) ethnicity (Black, Asian, Hispanic, middle eastern, other, white, unknown), disease variables                                                                                                                      |
| The Lancet | 27/03/2021 | Discontinuing $\beta$ -lactam treatment after 3 days for patients with community-acquired pneumonia in non-critical care wards (PTC): a double-blind, randomised, placebo-controlled, non-inferiority trial                                                                                                                                  | 10.1016/S0140-6736(21)00313-5 | UK  | France       | Original research (full paper) | RCT                                 | Yes: Age, sex (female/male),                                                                                                                                                                                                                          |
| JAMA       | 13/04/2021 | Effect of Subcutaneous Semaglutide vs Placebo as an Adjunct to Intensive Behavioural Therapy on Body Weight in Adults With Overweight or Obesity The STEP 3 Randomized Clinical Trial                                                                                                                                                        | 10.1001/jama.2021.1831        | USA | USA/UK       | Original research (full paper) | RCT                                 | Yes: age, sex (women, men), race (white, black or African American, other, Asian, Native Hawaiian or other pacific island, American Indian or Alaska native, Hispanic or Latino ethnic group, body weight, BMI, comorbidities, clinical measurements, |
| JAMA       | 13/04/2021 | Effect of Continued Weekly Subcutaneous Semaglutide vs Placebo on Weight Loss Maintenance in Adults With                                                                                                                                                                                                                                     | 10.1001/jama.2021.3224        | USA | Global       | Original research (full paper) | RCT                                 | Yes: age, sex (women, men), race (white, black or African American, other, Asian, Hispanic or Latino ethnic group), body weight, BMI,                                                                                                                 |

|      |            |                                                                                                                                                                                                 |                        |     |          |                                |                                 |                                                                                                                                                                                                                                                                   |
|------|------------|-------------------------------------------------------------------------------------------------------------------------------------------------------------------------------------------------|------------------------|-----|----------|--------------------------------|---------------------------------|-------------------------------------------------------------------------------------------------------------------------------------------------------------------------------------------------------------------------------------------------------------------|
|      |            | Overweight or Obesity The STEP 4 Randomized Clinical Trial                                                                                                                                      |                        |     |          |                                |                                 | comorbidities, clinical measurements,                                                                                                                                                                                                                             |
| JAMA | 13/04/2021 | Effect of Ivermectin on Time to Resolution of Symptoms Among Adults with Mild COVID-19A Randomized Clinical Trial                                                                               | 10.1001/jama.2021.3071 | USA | Colombia | Original research (full paper) | RCT                             | Yes: age, sex (male, female), race or ethnic group (mixed race, Black or African American, Colombian native), Health Insurance (private/semiprivate, government subsidised, uninsured), number of people in the household, current smoker, BMI, Comorbidities etc |
| JAMA | 13/04/2021 | Binding and Neutralization Antibody Titers After a Single Vaccine Dose in Health Care Workers Previously Infected With SARS-CoV-2                                                               | 10.1001/jama.2021.3341 | USA | USA      | Original research (Letter)     | Cohort study                    | Yes: age, sex (male, female), race/ethnicity (Black or Black American, White, Asian) vaccine received                                                                                                                                                             |
| JAMA | 13/04/2021 | Discriminant Accuracy of the SOFA Score for Determining the Probable Mortality of Patients With COVID-19 Pneumonia Requiring Mechanical Ventilation                                             | 10.1001/jama.2021.1545 | USA | USA      | Original research (Letter)     | Cohort study                    | Yes: age, sex (male, female), race/ethnicity (Non-Hispanic white, Hispanic, Native American, Black), BMI, comorbidities, lab results                                                                                                                              |
| JAMA | 06/04/2021 | Effect of Low-Intensity vs High-Intensity Home-Based Walking Exercise on Walk Distance in Patients With Peripheral Artery Disease The LITE Randomized Clinical Trial                            | 10.1001/jama.2021.2536 | USA | USA      | Original research (full paper) | RCT                             | Yes: Age, Sex (Male/Female), Race White, Black, Asian, Other), Hispanic ethnicity.                                                                                                                                                                                |
| JAMA | 06/04/2021 | Effect of Celecoxib vs Placebo Added to Standard Adjuvant Therapy on Disease-Free Survival Among Patients With Stage III Colon Cancer The CALGB/SWOG 80702 (Alliance) Randomized Clinical Trial | 10.1001/jama.2021.2454 | USA | USA      | Original research (full paper) | RCT                             | Yes: Age, Sex (Men/Women), Race (White, Black or African American, Asian, All others or not reported), Hispanic or Latino %) Disease characteristics                                                                                                              |
| JAMA | 06/04/2021 | Antimicrobial Use in a Cohort of US Nursing Homes, 2017                                                                                                                                         | 10.1001/jama.2021.2900 | USA | USA      | Original research (full paper) | Cohort study                    | Yes: Age, sex (men/women), race/ethnicity (Other, Hispanic or Latino, Black non-Hispanic, white non-Hispanic, )                                                                                                                                                   |
| JAMA | 06/04/2021 | Trends in Age at Natural Menopause and Reproductive Life Span Among US Women, 1959-2018                                                                                                         | 10.1001/jama.2021.0278 | USA | USA      | Original research (Letter)     | Epidemiologic assessment survey | Yes: Age, (all female), Race/ethnicity (White, Black, Hispanic, non-US born), Educational attainment,                                                                                                                                                             |

|      |            |                                                                                                                                              |                         |     |             |                                |                                 |                                                         |
|------|------------|----------------------------------------------------------------------------------------------------------------------------------------------|-------------------------|-----|-------------|--------------------------------|---------------------------------|---------------------------------------------------------|
|      |            |                                                                                                                                              |                         |     |             |                                |                                 | poverty (Poverty income ratio), other health indicators |
| JAMA | 30/03/2021 | Intubation Practices and Adverse Peri-intubation Events in Critically Ill Patients From 29 Countries                                         | 10.1001/jama.2021.1727  | USA | Global      | Original research (full paper) | Other observational study       | Yes: Age, Women%, comorbidities                         |
| PNAS | 30/03/2021 | Estrogen receptor $\beta$ and treatment with a phytoestrogen are associated with inhibition of nuclear translocation of EGFR in the prostate | 10.1073/pnas.2011269118 | USA | Sweden      | Original research (full paper) | Cohort study (lab)              | Yes, Sex (all Males), age ethnicity                     |
| PNAS | 30/03/2021 | Health and economic impact of the pneumococcal conjugate vaccine in hindering antimicrobial resistance in China                              | 10.1073/pnas.2004933118 | USA | China       | Original research (full paper) | Other (Mathematical Modelling ) | Yes age                                                 |
| PNAS | 16/03/2021 | Loss of expression of both miR-15/16 loci in CML transition to blast crisis                                                                  | 10.1073/pnas.2101566118 | USA | USA         | Original research (full paper) | Cohort study (lab)              | Yes, sex                                                |
| PNAS | 09/03/2021 | Influence of a COVID-19 vaccine's effectiveness and safety profile on vaccination acceptance                                                 | 10.1073/pnas.2021726118 | USA | USA         | Original research (full paper) | Survey                          | Yes, sex, age, race                                     |
| PNAS | 09/03/2021 | Elevated cerebrospinal fluid cytokine levels in tuberculous meningitis predict survival in response to dexamethasone                         | 10.1073/pnas.2024852118 | USA | USA         | Original research (full paper) | Cohort study (lab/modelling)    | Yes age, (sex/gender not reported)                      |
| PNAS | 02/03/2021 | Glucagon blockade restores functional $\beta$ -cell mass in type 1 diabetic mice and enhances function of human islets                       | 10.1073/pnas.2022142118 | USA | USA         | Original research (full paper) | Interventional (lab)            | Yes Sex, Age                                            |
| PNAS | 23/03/2021 | Modelling SARS-CoV-2 viral kinetics and association with mortality in hospitalized patients from the French COVID cohort                     | 10.1073/pnas.2017962118 | USA | France      | Original research (full paper) | Cohort study                    | Yes, Gender, Age                                        |
| PNAS | 09/02/2021 | Arsenic trioxide replacing or reducing chemotherapy in consolidation therapy for acute promyelocytic leukemia (APL2012 trial)                | 10.1073/pnas.2020382118 | USA | China       | Original research (full paper) | RCT                             | Yes, age, sex                                           |
| PNAS | 02/02/2021 | Efficient detection and post-surgical monitoring of colon cancer with a multi-marker DNA methylation liquid biopsy                           | 10.1073/pnas.2017421118 | USA | China       | Original research (full paper) | Cohort study                    | Yes, Sex, age                                           |
| PNAS | 05/01/2021 | A data-driven approach to identify risk profiles and protective drugs in COVID-19                                                            | 10.1073/pnas.2016877118 | USA | Switzerland | Original research (full paper) | Cohort study                    | Yes, age, sex                                           |

|                 |            |                                                                                                                                                                    |                               |        |                |                                                |                                     |                                                                                                                    |
|-----------------|------------|--------------------------------------------------------------------------------------------------------------------------------------------------------------------|-------------------------------|--------|----------------|------------------------------------------------|-------------------------------------|--------------------------------------------------------------------------------------------------------------------|
| Nature Medicine | 15/04/2021 | Integrative microbiomics in bronchiectasis exacerbations                                                                                                           | 10.1016/S0140-6736(21)00313-5 | US     | Asia/Scotland  | Original research (full paper)                 | Cohort study                        | yes; age, gender, geographic origin, aetiology, smoking status, BSI (status/score), BMI, MRC, FEV1)                |
| Nature Medicine | 15/04/2021 | Assessment of medication self-administration using artificial intelligence                                                                                         | 10.1038/s41591-021-01273-1    | US     | US/ Kosovo     | Original research (full paper)                 | Cohort study                        | yes; gender, and Age                                                                                               |
| Nature Medicine | 15/04/2021 | Malaria is a cause of iron deficiency in African children                                                                                                          | 10.1038/s41591-021-01238-4    | US     | Africa         | Original research (brief communication/letter) | Cohort study                        | yes; age, gender (female), inflammation, underweight                                                               |
| Nature Medicine | 15/04/2021 | Attributes and predictors of long COVID                                                                                                                            | 10.1038/s41591-021-01292-y    | US     | UK, US, Sweden | Original research (brief communication/letter) | Cohort study                        | yes: country, sex, age (years), age group, obese (%), BMI, comorbidities, IMD, hospital visits, symptoms           |
| Nature Medicine | 15/04/2021 | Development of a human skin commensal microbe for bacteriotherapy of atopic dermatitis and use in a phase 1 randomized clinical trial                              | 10.1038/s41591-021-01256-2    | US     | US             | Original research (full paper)                 | RCT                                 | yes; age, sex, ethnicity and race                                                                                  |
| Nature Medicine | 15/04/2021 | Fetal cranial growth trajectories are associated with growth and neurodevelopment at 2 years of age: INTERBIO-21st Fetal Study                                     | 10.1038/s41591-021-01280-2    | US     | Global         | Original research (brief communication/letter) | Cohort study                        | yes; age. Sex, SES (university education, married/living as married, work outside of home), health status outcomes |
| Nature Medicine | 15/04/2021 | altered perivascular fibroblast activity predicts ALS disease onset                                                                                                | 10.1038/s41591-021-01295-9    | US     | Europe         | Original research (brief communication/letter) | Interventional other (lab)          | yes; age, gender                                                                                                   |
| Nature Medicine | 15/04/2021 | Homozygous BCMA gene deletion in response to anti-BCMA CAR T cells in a patient with multiple myeloma                                                              | 10.1038/s41591-021-01245-5    | US     | Germany        | Original research (brief communication/letter) | Other Observational (lab)           | yes; age, sex                                                                                                      |
| Nature Medicine | 15/03/2021 | Impaired meningeal lymphatic drainage in patients with idiopathic Parkinson's disease                                                                              | 10.1038/s41591-020-01198-1    | US     | China/USA      | Original research (brief communication/letter) | Case control study                  | yes; n (%) female, age,                                                                                            |
| Nature Medicine | 15/03/2021 | TCR-engineered T cells targeting E7 for patients with metastatic HPV-associated epithelial cancers                                                                 | 10.1038/s41591-020-01225-1    | US     | US             | Original research (brief communication/letter) | Interventional trial (not RCT)      | yes; age, sex male/female,                                                                                         |
| PLOS One        | 19/04/2021 | Effect of dietary treatment and fluid intake on the prevention of recurrent calcium stones and changes in urine composition: A meta-analysis and systematic review | 10.1371/journal.pone.0250257  | USA/UK | China          | Original research (full paper)                 | Systematic review and meta-analysis | Yes: Age, male (n)                                                                                                 |
| PLOS One        | 19/04/2021 | Prognostic value of the postoperative neutrophil-                                                                                                                  | 10.1371/journal.pone.0250091  | USA/UK | China          | Original research (full paper)                 | Meta-analysis                       | Yes: age group, male vs female, disease characteristics                                                            |

|          |            |                                                                                                                                                                          |                              |        |         |                                |                                      |                                                                                                                                        |
|----------|------------|--------------------------------------------------------------------------------------------------------------------------------------------------------------------------|------------------------------|--------|---------|--------------------------------|--------------------------------------|----------------------------------------------------------------------------------------------------------------------------------------|
|          |            | lymphocyte ratio in solid tumors: A meta-analysis                                                                                                                        |                              |        |         |                                |                                      |                                                                                                                                        |
| PLOS One | 19/04/2021 | Predicting poor outcomes in children aged 1–12 with respiratory tract infections: A systematic review                                                                    | 10.1371/journal.pone.0249533 | USA/UK | UK      | Original research (full paper) | systematic review (no meta-analysis) | Yes: age only                                                                                                                          |
| PLOS One | 16/04/2021 | Effect of smoking status and programmed death-ligand 1 expression on the microenvironment and malignant transformation of oral leukoplakia: A retrospective cohort study | 10.1371/journal.pone.0250359 | USA/UK | Japan   | Original research (full paper) | Cohort study                         | Yes: sex (Male, Female), Age, alcohol drinking, lesion site, disease specific features                                                 |
| PLOS One | 16/04/2021 | A dose-dependent beneficial effect of methotrexate on the risk of interstitial lung disease in rheumatoid arthritis patients                                             | 10.1371/journal.pone.0250339 | USA/UK | Poland  | Original research (full paper) | Cohort study                         | Yes: Age, male sex, disease specific factors                                                                                           |
| PLOS One | 16/04/2021 | CT-based determination of excessive visceral adipose tissue is associated with an impaired survival in critically ill patients                                           | 10.1371/journal.pone.0250321 | USA/UK | Germany | Original research (full paper) | Cohort study                         | Yes: Gender (male, female), Age, BMI, disease specific features and comorbidities                                                      |
| PLOS One | 16/04/2021 | Parental educational level and childhood wheezing and asthma: A prospective cohort study from the Japan Environment and Children's Study (plos.org)                      | 10.1371/journal.pone.0250255 | USA/UK | Japan   | Original research (full paper) | Cohort study                         | Yes: Sex (boy/Girl), Child age, mothers educational level, fathers educational level                                                   |
| PLOS One | 16/04/2021 | The processing of intimately familiar and unfamiliar voices: Specific neural responses of speaker recognition and identification                                         | 10.1371/journal.pone.0250214 | USA/UK | Canada  | Original research (full paper) | Cohort study                         | Yes: '8 females', age                                                                                                                  |
| PLOS One | 16/04/2021 | Pathological complete response of adding targeted therapy to neoadjuvant chemotherapy for inflammatory breast cancer: A systematic review                                | 10.1371/journal.pone.0250057 | USA/UK | Global  | Original research (full paper) | systematic review (no meta-analysis) | Yes: Age, (all females)                                                                                                                |
| PLOS One | 16/04/2021 | Dose-response relationships of intestinal organs and excessive mucus discharge after gynaecological radiotherapy                                                         | 10.1371/journal.pone.0250004 | USA/UK | Sweden  | Original research (full paper) | Cohort study                         | Yes: Age, (all females)                                                                                                                |
| BMJ      | 14/04/2021 | Associations of healthy lifestyle and socioeconomic status with mortality and incident cardiovascular disease: two prospective cohort studies                            | 10.1136/bmj.n604             | UK     | USA/UK  | Original research (full paper) | Cohort study                         | yes; mean age, men, white ethnicity or race, married, household income, occupation, education, health insurance, socio-economic index, |

|     |            |                                                                                                                                                |                  |    |                     |                                |                                     |                                                                                                                                                                                                                                                                                                                                                                                                                                            |
|-----|------------|------------------------------------------------------------------------------------------------------------------------------------------------|------------------|----|---------------------|--------------------------------|-------------------------------------|--------------------------------------------------------------------------------------------------------------------------------------------------------------------------------------------------------------------------------------------------------------------------------------------------------------------------------------------------------------------------------------------------------------------------------------------|
|     |            |                                                                                                                                                |                  |    |                     |                                |                                     | smoking, alcohol, diet, BMI, comorbidities                                                                                                                                                                                                                                                                                                                                                                                                 |
| BMJ | 14/04/2021 | Continued versus discontinued oxytocin stimulation in the active phase of labour (CONDISOX): double blind randomised controlled trial          | 10.1136/bmj.n716 | UK | Denmark/Netherlands | Original research (full paper) | RCT                                 | yes; age, (all women ), white European, BMI, smoking, married or living with partner, parity, comorbidities                                                                                                                                                                                                                                                                                                                                |
| BMJ | 07/04/2021 | Linked electronic health records for research on a nationwide cohort of more than 54 million people in England: data resource                  | 10.1136/bmj.n826 | UK | UK                  | Original research (full paper) | Cohort study                        | yes; sex, age, ethnicity, comorbidities,                                                                                                                                                                                                                                                                                                                                                                                                   |
| BMJ | 06/04/2021 | E-health StandingTall balance exercise for fall prevention in older people: results of a two year randomised controlled trial                  | 10.1136/bmj.n740 | UK | Australia           | Original research (full paper) | RCT                                 | yes; age, gender, BMI, education, living alone, owns a computer,                                                                                                                                                                                                                                                                                                                                                                           |
| BMJ | 31/03/2021 | Adherence to the test, trace, and isolate system in the UK: results from 37 nationally representative surveys                                  | 10.1136/bmj.n608 | UK | UK                  | Original research (full paper) | Survey                              | yes; gender, age, dependant child in household, clinical vulnerability, household member with chronic illness, employment status, socioeconomic grade, index of multiple deprivation, highest educational or professional qualification, ethnicity (white British, white other, mixed, Asian or Asian British, black or black British, Arab or other (don't know or prefer not to say), living alone, marital status, employment, hardship |
| BMJ | 31/03/2021 | Post-covid syndrome in individuals admitted to hospital with covid-19: retrospective cohort study                                              | 10.1136/bmj.n693 | UK | UK                  | Original research (full paper) | Cohort study                        | yes; age, sex (men/women), ethnicity (white, Asian, mixed/other, unknown) index od multiple deprivation category                                                                                                                                                                                                                                                                                                                           |
| BMJ | 24/03/2021 | Comparative efficacy of interventions for reducing symptoms of depression in people with dementia: systematic review and network meta-analysis | 10.1136/bmj.n532 | UK | Canada              | Original research (full paper) | systematic review and meta-analysis | yes; age, % women enrolled                                                                                                                                                                                                                                                                                                                                                                                                                 |
| BMJ | 24/03/2022 | Association of spontaneous abortion with all cause and cause specific premature mortality: prospective cohort study                            | 10.1136/bmj.n530 | UK | US                  | Original research (full paper) | Cohort study                        | yes; age, (all women) race/ ethnicity (n %) non-Hispanic white, non-Hispanic black, Hispanic and other                                                                                                                                                                                                                                                                                                                                     |



|          |            |                                                                                                                                                                                   |                                |    |                 |                                |                                     |                                                                                                                                                  |
|----------|------------|-----------------------------------------------------------------------------------------------------------------------------------------------------------------------------------|--------------------------------|----|-----------------|--------------------------------|-------------------------------------|--------------------------------------------------------------------------------------------------------------------------------------------------|
| BMJ      | 23/02/2022 | Age dependent associations of risk factors with heart failure: pooled population based cohort study                                                                               | 10.1136/bmj.n461               | UK | Global          | Original research (full paper) | cohort study                        | Yes: age, male sex, white ethnicity,                                                                                                             |
| BMJ      | 18/03/2021 | Association between living with children and outcomes from covid-19: OpenSAFELY cohort study of 12 million adults in England                                                      | 10.1136/bmj.n628               | UK | UK              | Original research (full paper) | Cohort study                        | Yes: age (groups), female sex, ethnicity (white, mixed, south Asian, black, other), Index of multiple deprivation, over 3 adults in a household, |
| Cochrane | 15/04/2021 | Abdominal ultrasound and alpha-foetoprotein for the diagnosis of hepatocellular carcinoma in adults with chronic liver disease                                                    | 10.1002/14651858.CD013346.pub2 | UK | Italy           | Original research (full paper) | systematic review and meta-analysis | yes: age, gender individually                                                                                                                    |
| Cochrane | 15/04/2021 | Thrombolytic therapy for pulmonary embolism                                                                                                                                       | 10.1002/14651858.CD004437.pub6 | UK | China           | Original research (full paper) | systematic review and meta-analysis | Yes: Age, 'sex' as men and women, when reporting characteristics of studies included                                                             |
| Cochrane | 14/04/2021 | Dopamine agonists for preventing ovarian hyperstimulation syndrome                                                                                                                | 10.1002/14651858.CD008605.pub4 | UK | China Australia | Original research (full paper) | systematic review and meta-analysis | Yes: Age if reported in primary study, all women,                                                                                                |
| Cochrane | 14/04/2021 | Regular treatment with formoterol and an inhaled corticosteroid versus regular treatment with salmeterol and an inhaled corticosteroid for chronic asthma: serious adverse events | 10.1002/14651858.CD007694.pub3 | UK | Ireland         | Original research (full paper) | systematic review and meta-analysis | Yes: Age, (no sex or gender reported)                                                                                                            |
| Cochrane | 14/04/2021 | Botulinum toxin type A versus anticholinergics for cervical dystonia                                                                                                              | 10.1002/14651858.CD004312.pub3 | UK | Portugal        | Original research (full paper) | systematic review and meta-analysis | Yes: age, % female                                                                                                                               |
| Cochrane | 13/04/2021 | Non-steroidal anti-inflammatory drugs (NSAIDs) for trigger finger                                                                                                                 | 10.1002/14651858.CD012789.pub2 | UK | Singapore       | Original research (full paper) | systematic review and meta-analysis | Yes: age, gender (male/female)                                                                                                                   |
| Cochrane | 12/04/2021 | Monitoring of stimulated cycles in assisted reproduction (IVF and ICSI)                                                                                                           | 10.1002/14651858.CD005289.pub4 | UK | UK              | Original research (full paper) | systematic review and meta-analysis | Yes: age, all female,                                                                                                                            |
| Cochrane | 10/04/2021 | Treatment for bleeding oesophageal varices in people with decompensated liver cirrhosis: a network meta-analysis                                                                  | 10.1002/14651858.CD013155.pub2 | UK | UK              | Original research (full paper) | systematic review and meta-analysis | Yes: age , 'females n and %'                                                                                                                     |
| Cochrane | 07/04/2021 | Anti-seizure medications for Lennox-Gastaut syndrome                                                                                                                              | 10.1002/14651858.CD003277.pub4 | UK | Italy           | Original research (full paper) | systematic review and meta-analysis | Yes: Age, sex (as per study), race/ethnicity                                                                                                     |
| Cochrane | 06/04/2021 | Primary prevention of variceal bleeding in people with oesophageal varices due to liver cirrhosis: a network meta-analysis                                                        | 10.1002/14651858.CD013121.pub2 | UK | UK              | Original research (full paper) | systematic review and meta-analysis | Yes: mean age, females n and %                                                                                                                   |

|                                |            |                                                                                                                                                        |                              |     |             |                                |                           |                                                 |
|--------------------------------|------------|--------------------------------------------------------------------------------------------------------------------------------------------------------|------------------------------|-----|-------------|--------------------------------|---------------------------|-------------------------------------------------|
| Cell Metabolism                | 06/04/2021 | Hyochoic acid species improve glucose homeostasis through a distinct TGR5 and FXR signaling mechanism                                                  | 10.1016/j.cmet.2020.11.017   | UK  | China       | Original research (full paper) | Cohort study              | Yes, Age, sex                                   |
| Cell Metabolism                | 02/03/2021 | The pyruvate-lactate axis modulates cardiac hypertrophy and heart failure                                                                              | 10.1016/j.cmet.2020.12.003   | UK  | USA         | Original research (full paper) | Other Observational (lab) | Yes, Age, sex                                   |
| Cell Metabolism                | 02/02/2021 | Neutrophils Fuel Effective Immune Responses through Gluconeogenesis and Glycogenesis                                                                   | 10.1016/j.cmet.2020.11.016   | UK  | Scotland    | Original research (full paper) | Other Observational (lab) | Yes, Age, sex                                   |
| Cell Metabolism                | 05/01/2021 | Acetyl-CoA Synthetase 2: A Critical Linkage in Obesity-Induced Tumorigenesis in Myeloma                                                                | 10.1016/j.cmet.2020.12.011   | UK  | USA         | Original research (full paper) | Other Observational (lab) | Yes, age, sex                                   |
| Cell Metabolism                | 01/12/2020 | Succinyl-CoA Ligase Deficiency in Pro-inflammatory and Tissue-Invasive T Cells                                                                         | 10.1016/j.cmet.2020.10.025   | UK  | USA         | Original research (full paper) | Other Observational (lab) | Yes, age, sex                                   |
| Cell Metabolism                | 01/12/2020 | SARS-CoV-2 Cell Entry Factors ACE2 and TMPRSS2 Are Expressed in the Microvasculature and Ducts of Human Pancreas but Are Not Enriched in $\beta$ Cells | 10.1016/j.cmet.2020.11.006   | UK  | USA         | Original research (full paper) | Other Observational (lab) | Yes, age, sex, ethnicity, BMI                   |
| Cell Metabolism                | 01/12/2020 | Expression of SARS-CoV-2 Entry Factors in the Pancreas of Normal Organ Donors and Individuals with COVID-19                                            | 10.1016/j.cmet.2020.11.005   | UK  | USA         | Original research (full paper) | Case control              | Yes, age, sex, ethnicity, BMI                   |
| Cell Metabolism                | 01/12/2020 | Elevation of JAML Promotes Diabetic Kidney Disease by Modulating Podocyte Lipid Metabolism                                                             | 10.1016/j.cmet.2020.10.019   | UK  | China       | Original research (full paper) | Other Observational (lab) | Yes, age, sex                                   |
| Cell Metabolism                | 03/11/2020 | Pyruvate Kinase Controls Signal Strength in the Insulin Secretory Pathway                                                                              | 10.1016/j.cmet.2020.10.007   | UK  | USA         | Original research (full paper) | Other Observational (lab) | Yes, age, sex                                   |
| Cell Metabolism                | 03/11/2020 | Bone Marrow Mesenchymal Stem Cells Support Acute Myeloid Leukemia Bioenergetics and Enhance Antioxidant Defense and Escape from Chemotherapy           | 10.1016/j.cmet.2020.09.001   | UK  | Switzerland | Original research (full paper) | Other Observational (lab) | Yes, age, sex                                   |
| Science translational medicine | 14/04/2021 | Imaging Enterobacteriales infections in patients using pathogen-specific positron emission tomography                                                  | 10.1126/scitranslmed.abe9805 | USA | USA         | Original research (full paper) | Other Observational (lab) | Yes: Age, Sex (M/F), weight, medical conditions |
| Science translational medicine | 14/04/2021 | Rituximab-resistant splenic memory B cells and newly engaged naive B cells fuel relapses in patients with immune thrombocytopenia                      | 10.1126/scitranslmed.abc3961 | USA | France      | Original research (full paper) | Other Observational (lab) | Yes: Age, gender (M/F)                          |

|                                |            |                                                                                                                                   |                              |     |             |                                |                            |                                                                                                       |
|--------------------------------|------------|-----------------------------------------------------------------------------------------------------------------------------------|------------------------------|-----|-------------|--------------------------------|----------------------------|-------------------------------------------------------------------------------------------------------|
| Science translational medicine | 07/04/2021 | SerpinB13 antibodies promote $\beta$ cell development and resistance to type 1 diabetes                                           | 10.1126/scitranslmed.abf1587 | USA | USA         | Original research (full paper) | cohort study               | Yes male to female ratio, age, diagnosis                                                              |
| Science translational medicine | 07/04/2021 | A selective HDAC8 inhibitor potentiates antitumor immunity and efficacy of immune checkpoint blockade in hepatocellular carcinoma | 10.1126/scitranslmed.aaz6804 | USA | Hong Kong   | Original research (full paper) | Interventional other (Lab) | Yes : sex male/female; Age; disease characteristics (in suppl table s1)                               |
| Science translational medicine | 07/04/2021 | Urolithin A improves muscle function by inducing mitophagy in muscular dystrophy                                                  | 10.1126/scitranslmed.abb0319 | USA | Switzerland | Original research (full paper) | Interventional other (Lab) | Yes (under 'Human Cells' heading) age, sex male (sex linked disorder),                                |
| Science translational medicine | 31/03/2021 | Soft, skin-interfaced sweat stickers for cystic fibrosis diagnosis and management                                                 | 10.1126/scitranslmed.abd8109 | USA | USA         | Original research (full paper) | Interventional other (Lab) | Yes Age, gender Female/male                                                                           |
| Science translational medicine | 31/03/2021 | Clearance of pegylated interferon by Kupffer cells limits NK cell activation and therapy response of patients with HBV infection  | 10.1126/scitranslmed.aba6322 | USA | USA         | Original research (full paper) | cohort study               | Yes (supp tab s1): sex %Male, % female, race 'Asian, Black, Caucasian', BMI, disease characteristics, |
| Science translational medicine | 31/03/2021 | Increasing breast milk betaine modulates Akkermansia abundance in mammalian neonates and improves long-term metabolic health      | 10.1126/scitranslmed.abb0322 | USA | Spain       | Original research (full paper) | cohort study               | Yes: Age, gender (M/F)                                                                                |
| Science translational medicine | 31/03/2021 | Transcriptional networks in at-risk individuals identify signatures of type 1 diabetes progression                                | 10.1126/scitranslmed.abd5666 | USA | UK          | Original research (full paper) | cohort study               | Yes: Age, race, race-ethnicity                                                                        |
| Science translational medicine | 17/03/2021 | GDE2-RECK controls ADAM10 $\alpha$ -secretase-mediated cleavage of amyloid precursor protein                                      | 10.1126/scitranslmed.abe6178 | USA | USA         | Original research (full paper) | Interventional other (Lab) | Yes: age, gender male/female, Race (White, Black)                                                     |

Table 2: Excluded articles from each journal

|                                |                                                                                                                                                 |
|--------------------------------|-------------------------------------------------------------------------------------------------------------------------------------------------|
| NEJM                           | Non-research articles (n= 24); Animal studies/Other non-human (n=0); human research with no participant level data reported (n=2)               |
| Lancet                         | Non-research articles (n= 82); Lancet Animal studies/Other non-human (n=0); human research with no participant level data reported (n=2)        |
| JAMA                           | Non-research articles (n=51); Animal studies/Other non-human (n=0); No participant level data reported (n=2)                                    |
| PNAS                           | Non-research articles (n=69); Animal studies/Other non-human (n=30); No participant level data reported (n=4)                                   |
| Nature Medicine                | Non-research articles (total n=18); Animal studies/Other non-human (n=1); No participant level data reported (n=7)                              |
| PLOSOne                        | Non-research articles (n=0); Animal studies/Other non-human (n=4); No participant level data reported (n=0)                                     |
| BMJ                            | Non-research articles (n=141); Animal studies/Other non-human (n=1); No participant level data reported (n=2)                                   |
| Cochrane                       | Non-research papers (n=0); Animal studies/Other non-human (n=0); No participant level data reported (n=1, but only because no studies included) |
| Cell metabolism                | Non-research articles (n=54); Animal studies/Other non-human (n=33); No participant level data reported (n=0)                                   |
| Science Translational Medicine | Non-research articles (n=3); Animal studies/Other non-human (n=14); No participant level data reported (n=5)                                    |

Table 3: Terms accepted within papers for reporting gender, ethnicity or SES

| Accepted gender reporting terms                                                                                                                                                                                                                                                         | Accepted ethnicity reporting terms                                                                                                                                                                                                                                                                       | Accepted Socio-economic status reporting terms                                                                                                                                                                                                                                                                                                                                                                                                                                                                                                                                                                                    |
|-----------------------------------------------------------------------------------------------------------------------------------------------------------------------------------------------------------------------------------------------------------------------------------------|----------------------------------------------------------------------------------------------------------------------------------------------------------------------------------------------------------------------------------------------------------------------------------------------------------|-----------------------------------------------------------------------------------------------------------------------------------------------------------------------------------------------------------------------------------------------------------------------------------------------------------------------------------------------------------------------------------------------------------------------------------------------------------------------------------------------------------------------------------------------------------------------------------------------------------------------------------|
| Male (number and/or %)<br>Female (number and/or %)<br>Gender: Male/Female (number and/or %)<br>Sex: Male/Female (number and/or %)<br>Male/ female /prefer not to say<br>Male/ Female/ other<br>Male: Female ratio<br>All female sex<br>All Male sex<br>Boy/Girl<br>Gender<br>Sex<br>M/F | Race<br>Ethnicity<br>Race or ethnic group<br>Race/ethnicity<br>Population sector<br>Geographic region<br>Results by continent<br>Geographic location<br>Geographic region<br>Race or ethnic group<br>Ethnicity<br>Non-US born<br>Native to America<br>Native American<br>White race<br>Geographic origin | Employment status<br>University level education<br>Urban residence<br>Index of multiple deprivation<br>Region of England<br>Education<br>Health Insurance (private/semiprivate, government subsidised, uninsured)<br>Number of people in household<br>Educational attainment<br>Poverty Index ratio<br>Mothers educational level/ Fathers educational level<br>Over 3 adults in household<br>Employment status<br>Hardship<br>SES (university education, married/living as married, work outside of home),<br>Household income<br>Socioeconomic grade<br>Highest educational or professional qualification<br>Socioeconomic Index |
